# Supplementary material for: Vascular PPARβ/δ Promotes Tumor Angiogenesis and Progression
Source: Cells. 2019 Dec 12;8(12):1623. doi: 10.3390/cells8121623 (PMC6952835; doi:10.3390/cells8121623)
Supplement: Supplementary file 1 [file cells-08-01623-s001.xls]

## Sheet: taxvsoil.DEG
Gene_id	readcount_tax	readcount_oil	log2FoldChange	pval	padj	Associated Gene Name	genetype	Description
ENSMUSG00000000317	2110.75813552353	532.986009617847	1.9856	0.00024572	0.026815	Bcl6b	protein_coding	B cell CLL/lymphoma 6, member B [Source:MGI Symbol;Acc:MGI:1278332]
ENSMUSG00000000416	34.6174655791057	6.9306078165703	2.3204	0.00052127	0.044134	Cttnbp2	protein_coding	cortactin binding protein 2 [Source:MGI Symbol;Acc:MGI:1353467]
ENSMUSG00000000489	5980.3786571274	1758.92995820564	1.7655	0.00033532	0.033753	Pdgfb	protein_coding	platelet derived growth factor, B polypeptide [Source:MGI Symbol;Acc:MGI:97528]
ENSMUSG00000001493	497.807172437329	117.951693758569	2.0774	5.7362e-05	0.0094078	Meox1	protein_coding	mesenchyme homeobox 1 [Source:MGI Symbol;Acc:MGI:103220]
ENSMUSG00000001930	6622.44321856276	1405.43447771149	2.2363	6.5819e-05	0.01036	Vwf	protein_coding	Von Willebrand factor homolog [Source:MGI Symbol;Acc:MGI:98941]
ENSMUSG00000001943	85.0152180741903	18.7643398861555	2.1797	0.00014759	0.019068	Vsig2	protein_coding	V-set and immunoglobulin domain containing 2 [Source:MGI Symbol;Acc:MGI:1928009]
ENSMUSG00000001946	3366.88279864517	1138.74629136227	1.564	0.00036972	0.035562	Esam	protein_coding	endothelial cell-specific adhesion molecule [Source:MGI Symbol;Acc:MGI:1916774]
ENSMUSG00000002228	390.655306426686	126.994717770989	1.6211	0.00038521	0.035851	Ppm1j	protein_coding	protein phosphatase 1J [Source:MGI Symbol;Acc:MGI:1919137]
ENSMUSG00000002799	1187.5035076801	311.526627682103	1.9305	7.8159e-05	0.011981	Jag2	protein_coding	jagged 2 [Source:MGI Symbol;Acc:MGI:1098270]
ENSMUSG00000002980	546.63209680197	136.183411045166	2.005	3.7579e-05	0.007224	Bcam	protein_coding	basal cell adhesion molecule [Source:MGI Symbol;Acc:MGI:1929940]
ENSMUSG00000003585	128.011084949411	18.7170347953608	2.7738	3.5955e-07	0.00038789	Sec14l2	protein_coding	SEC14-like 2 (S. cerevisiae) [Source:MGI Symbol;Acc:MGI:1915065]
ENSMUSG00000004655	20269.7273336194	3775.10310233384	2.4247	4.6798e-07	0.00045731	Aqp1	protein_coding	aquaporin 1 [Source:MGI Symbol;Acc:MGI:103201]
ENSMUSG00000005672	1456.87437487078	471.546957419361	1.6274	0.000361	0.035425	Kit	protein_coding	kit oncogene [Source:MGI Symbol;Acc:MGI:96677]
ENSMUSG00000006403	13388.1584097245	1457.36588722352	3.1995	1.7006e-05	0.0040764	Adamts4	protein_coding	a disintegrin-like and metallopeptidase (reprolysin type) with thrombospondin type 1 motif, 4 [Source:MGI Symbol;Acc:MGI:1339949]
ENSMUSG00000009378	26.7366740006675	3.9475191840091	2.7598	0.00023153	0.025981	Slc16a12	protein_coding	solute carrier family 16 (monocarboxylic acid transporters), member 12 [Source:MGI Symbol;Acc:MGI:2147716]
ENSMUSG00000009545	521.698424832912	97.5432088936842	2.4191	5.6799e-07	0.00053284	Kcnq1	protein_coding	potassium voltage-gated channel, subfamily Q, member 1 [Source:MGI Symbol;Acc:MGI:108083]
ENSMUSG00000011263	494.427930966052	100.395161506723	2.3001	3.1089e-06	0.001497	Exoc3l2	protein_coding	exocyst complex component 3-like 2 [Source:MGI Symbol;Acc:MGI:1921713]
ENSMUSG00000014164	98.0662056506054	20.9589454497277	2.2262	5.256e-05	0.0087908	Klhl3	protein_coding	kelch-like 3 [Source:MGI Symbol;Acc:MGI:2445185]
ENSMUSG00000014329	112.001030278387	29.1475386460492	1.9421	0.00036919	0.035562	Bicc1	protein_coding	bicaudal C homolog 1 (Drosophila) [Source:MGI Symbol;Acc:MGI:1933388]
ENSMUSG00000014813	5848.76306451617	1098.53797323474	2.4125	9.2676e-07	0.00079007	Stc1	protein_coding	stanniocalcin 1 [Source:MGI Symbol;Acc:MGI:109131]
ENSMUSG00000015468	3660.66297364976	771.324078661753	2.2467	2.1888e-05	0.0049839	Notch4	protein_coding	notch 4 [Source:MGI Symbol;Acc:MGI:107471]
ENSMUSG00000016494	5139.72644338987	1334.52443139149	1.9454	3.0111e-05	0.0062245	Cd34	protein_coding	CD34 antigen [Source:MGI Symbol;Acc:MGI:88329]
ENSMUSG00000016758	115.69800309711	36.2861334679908	1.6729	0.00056831	0.047264	Bik	protein_coding	BCL2-interacting killer [Source:MGI Symbol;Acc:MGI:1206591]
ENSMUSG00000016763	10.4010600475095	0.563742569637207	4.2056	0.00048167	0.041839	Scube1	protein_coding	signal peptide, CUB domain, EGF-like 1 [Source:MGI Symbol;Acc:MGI:1890616]
ENSMUSG00000017309	766.508623303224	217.651339152395	1.8163	0.00016777	0.020819	Cd300lg	protein_coding	CD300 antigen like family member G [Source:MGI Symbol;Acc:MGI:1289168]
ENSMUSG00000017314	359.342212790345	67.9340398559927	2.4032	1.743e-06	0.0011048	Mpp2	protein_coding	membrane protein, palmitoylated 2 (MAGUK p55 subfamily member 2) [Source:MGI Symbol;Acc:MGI:1858257]
ENSMUSG00000017344	54.8711302230042	6.59709867551112	3.0561	1.4811e-06	0.0010014	Vtn	protein_coding	vitronectin [Source:MGI Symbol;Acc:MGI:98940]
ENSMUSG00000017446	590.464220050638	130.570660039726	2.177	9.2287e-06	0.0025395	C1qtnf1	protein_coding	C1q and tumor necrosis factor related protein 1 [Source:MGI Symbol;Acc:MGI:1919254]
ENSMUSG00000017817	84.6242396778765	11.2614236739802	2.9097	9.7694e-07	0.00079007	Jph2	protein_coding	junctophilin 2 [Source:MGI Symbol;Acc:MGI:1891496]
ENSMUSG00000018593	46283.2671634667	12460.194466534	1.8932	4.2218e-05	0.0076755	Sparc	protein_coding	secreted acidic cysteine rich glycoprotein [Source:MGI Symbol;Acc:MGI:98373]
ENSMUSG00000019326	185.772880904058	46.1065303707656	2.0105	0.00014506	0.019007	Aoc3	protein_coding	amine oxidase, copper containing 3 [Source:MGI Symbol;Acc:MGI:1306797]
ENSMUSG00000019647	283.549790759169	42.819857936732	2.7273	4.4901e-05	0.0079777	Sema6a	protein_coding	sema domain, transmembrane domain (TM), and cytoplasmic domain, (semaphorin) 6A [Source:MGI Symbol;Acc:MGI:1203727]
ENSMUSG00000019846	4329.9291908133	774.926922767954	2.4822	1.6649e-07	0.00024404	Lama4	protein_coding	laminin, alpha 4 [Source:MGI Symbol;Acc:MGI:109321]
ENSMUSG00000019889	705.494521831159	218.750497398525	1.6893	0.00026813	0.028074	Ptprk	protein_coding	protein tyrosine phosphatase, receptor type, K [Source:MGI Symbol;Acc:MGI:103310]
ENSMUSG00000019899	122.466253321624	20.6542458073075	2.5679	0.00013794	0.018563	Lama2	protein_coding	laminin, alpha 2 [Source:MGI Symbol;Acc:MGI:99912]
ENSMUSG00000020044	1851.67241988081	296.403673323667	2.6432	3.5798e-06	0.0015548	Timp3	protein_coding	tissue inhibitor of metalloproteinase 3 [Source:MGI Symbol;Acc:MGI:98754]
ENSMUSG00000020121	268.040859908174	43.1202245647348	2.636	3.9162e-05	0.0073477	Srgap1	protein_coding	SLIT-ROBO Rho GTPase activating protein 1 [Source:MGI Symbol;Acc:MGI:2152936]
ENSMUSG00000020123	60.4952819648559	12.6994285639439	2.2521	0.00038123	0.035783	Avpr1a	protein_coding	arginine vasopressin receptor 1A [Source:MGI Symbol;Acc:MGI:1859216]
ENSMUSG00000020154	3251.85481298898	551.982856214601	2.5586	0.00021495	0.024957	Ptprb	protein_coding	protein tyrosine phosphatase, receptor type, B [Source:MGI Symbol;Acc:MGI:97809]
ENSMUSG00000020303	233.95777416166	66.8055570429476	1.8082	0.00012375	0.017173	Stc2	protein_coding	stanniocalcin 2 [Source:MGI Symbol;Acc:MGI:1316731]
ENSMUSG00000020357	1528.56518046697	241.584832441717	2.6616	5.1485e-06	0.0018864	Flt4	protein_coding	FMS-like tyrosine kinase 4 [Source:MGI Symbol;Acc:MGI:95561]
ENSMUSG00000020427	54911.32069767	15172.7301444467	1.8556	3.1085e-05	0.0063394	Igfbp3	protein_coding	insulin-like growth factor binding protein 3 [Source:MGI Symbol;Acc:MGI:96438]
ENSMUSG00000020810	271.131205588108	76.1630086375878	1.8318	0.00023789	0.026318	Cygb	protein_coding	cytoglobin [Source:MGI Symbol;Acc:MGI:2149481]
ENSMUSG00000020811	243.791623547479	48.4720845232147	2.3304	2.0812e-06	0.0012515	Wscd1	protein_coding	WSC domain containing 1 [Source:MGI Symbol;Acc:MGI:2448493]
ENSMUSG00000020875	154.052274524955	31.2419946988694	2.3019	3.0341e-06	0.001497	Hoxb9	protein_coding	homeobox B9 [Source:MGI Symbol;Acc:MGI:96190]
ENSMUSG00000020928	89.4938056233648	24.1572082944714	1.8893	0.00044104	0.03948	Higd1b	protein_coding	HIG1 domain family, member 1B [Source:MGI Symbol;Acc:MGI:1922939]
ENSMUSG00000021217	127.057725257243	34.2838511842584	1.8899	0.0003059	0.031058	Tshz3	protein_coding	teashirt zinc finger family member 3 [Source:MGI Symbol;Acc:MGI:2442819]
ENSMUSG00000021256	1457.8463464664	139.030751034471	3.3904	2.1424e-05	0.0049747	Vash1	protein_coding	vasohibin 1 [Source:MGI Symbol;Acc:MGI:2442543]
ENSMUSG00000021268	333.908976590843	45.116577967787	2.8877	5.1015e-08	9.2035e-05	Meg3	lincRNA	maternally expressed 3 [Source:MGI Symbol;Acc:MGI:1202886]
ENSMUSG00000021294	534.212861329549	76.5124336774589	2.8036	2.5847e-08	8.3678e-05	Kif26a	protein_coding	kinesin family member 26A [Source:MGI Symbol;Acc:MGI:2447072]
ENSMUSG00000021806	5127.64969442023	761.540176076602	2.7513	1.0728e-05	0.002765	Nid2	protein_coding	nidogen 2 [Source:MGI Symbol;Acc:MGI:1298229]
ENSMUSG00000021904	461.961080465504	114.810504398604	2.0085	0.00023073	0.025981	Sema3g	protein_coding	sema domain, immunoglobulin domain (Ig), short basic domain, secreted, (semaphorin) 3G [Source:MGI Symbol;Acc:MGI:3041242]
ENSMUSG00000022197	330.187163495349	75.5285443685156	2.1282	3.2797e-05	0.0065186	Pdzd2	protein_coding	PDZ domain containing 2 [Source:MGI Symbol;Acc:MGI:1922394]
ENSMUSG00000022220	1425.96153947832	273.006770140943	2.3849	3.3192e-06	0.001497	Adcy4	protein_coding	adenylate cyclase 4 [Source:MGI Symbol;Acc:MGI:99674]
ENSMUSG00000022623	2650.17010259281	603.928930641712	2.1336	9.6664e-06	0.0025762	Shank3	protein_coding	SH3/ankyrin domain gene 3 [Source:MGI Symbol;Acc:MGI:1930016]
ENSMUSG00000022836	780.98422596343	161.085267994771	2.2775	5.6897e-06	0.0019339	Mylk	protein_coding	myosin, light polypeptide kinase [Source:MGI Symbol;Acc:MGI:894806]
ENSMUSG00000024140	3986.6658187883	956.737504973264	2.059	2.169e-05	0.0049839	Epas1	protein_coding	endothelial PAS domain protein 1 [Source:MGI Symbol;Acc:MGI:109169]
ENSMUSG00000024168	451.384302280867	132.909418710582	1.7639	0.00015795	0.019809	Tmem204	protein_coding	transmembrane protein 204 [Source:MGI Symbol;Acc:MGI:3039635]
ENSMUSG00000024440	784.357736696606	97.261449119963	3.0116	4.3997e-06	0.0017489	Pcdh12	protein_coding	protocadherin 12 [Source:MGI Symbol;Acc:MGI:1855700]
ENSMUSG00000024512	2.08640003820808	17.2284997401958	-3.0457	0.0002981	0.030663	Dynap	protein_coding	dynactin associated protein [Source:MGI Symbol;Acc:MGI:1922827]
ENSMUSG00000024534	174.295320618202	46.3439073936492	1.9111	9.9667e-05	0.014519	Sncaip	protein_coding	synuclein, alpha interacting protein (synphilin) [Source:MGI Symbol;Acc:MGI:1915097]
ENSMUSG00000024620	683.460846856482	204.847869419398	1.7383	0.00034896	0.034725	Pdgfrb	protein_coding	platelet derived growth factor receptor, beta polypeptide [Source:MGI Symbol;Acc:MGI:97531]
ENSMUSG00000025597	191.717836008028	46.2170558261721	2.0525	6.7604e-05	0.01057	Klhl4	protein_coding	kelch-like 4 [Source:MGI Symbol;Acc:MGI:2442829]
ENSMUSG00000025608	3020.51107629432	691.279851287452	2.1275	6.2261e-06	0.0020499	Podxl	protein_coding	podocalyxin-like [Source:MGI Symbol;Acc:MGI:1351317]
ENSMUSG00000025666	324.956302748159	81.3802509237867	1.9975	4.1405e-05	0.0075865	Tmem47	protein_coding	transmembrane protein 47 [Source:MGI Symbol;Acc:MGI:2177570]
ENSMUSG00000025780	96.8960912536935	24.4426191943195	1.987	0.00042807	0.03885	Itih5	protein_coding	inter-alpha (globulin) inhibitor H5 [Source:MGI Symbol;Acc:MGI:1925751]
ENSMUSG00000025902	1131.42593904658	261.262179902391	2.1146	5.3704e-06	0.0018912	Sox17	protein_coding	SRY (sex determining region Y)-box 17 [Source:MGI Symbol;Acc:MGI:107543]
ENSMUSG00000026208	278.578693267024	84.0162421199798	1.7293	0.00045745	0.040485	Des	protein_coding	desmin [Source:MGI Symbol;Acc:MGI:94885]
ENSMUSG00000026398	42.708721992614	9.59805236174091	2.1537	0.00050578	0.043142	Nr5a2	protein_coding	nuclear receptor subfamily 5, group A, member 2 [Source:MGI Symbol;Acc:MGI:1346834]
ENSMUSG00000026447	387.763980574644	94.5159232806955	2.0365	6.3332e-05	0.010173	Pik3c2b	protein_coding	phosphoinositide-3-kinase, class 2, beta polypeptide [Source:MGI Symbol;Acc:MGI:2685045]
ENSMUSG00000026640	1264.78831570206	249.127040373322	2.3439	1.354e-06	0.00096225	Plxna2	protein_coding	plexin A2 [Source:MGI Symbol;Acc:MGI:107684]
ENSMUSG00000026678	2857.07286256269	487.47748596604	2.5511	0.00038183	0.035783	Rgs5	protein_coding	regulator of G-protein signaling 5 [Source:MGI Symbol;Acc:MGI:1098434]
ENSMUSG00000026814	4140.46627100978	1331.36842606203	1.6369	0.00037013	0.035562	Eng	protein_coding	endoglin [Source:MGI Symbol;Acc:MGI:95392]
ENSMUSG00000026890	227.36281138584	47.0691692657799	2.2721	9.4761e-06	0.0025545	Lhx6	protein_coding	LIM homeobox protein 6 [Source:MGI Symbol;Acc:MGI:1306803]
ENSMUSG00000027074	802.365219961803	255.281046538687	1.6522	0.00049581	0.042751	Slc43a3	protein_coding	solute carrier family 43, member 3 [Source:MGI Symbol;Acc:MGI:1931054]
ENSMUSG00000027200	2664.86993927965	772.562924293346	1.7863	0.00013763	0.018563	Sema6d	protein_coding	sema domain, transmembrane domain (TM), and cytoplasmic domain, (semaphorin) 6D [Source:MGI Symbol;Acc:MGI:2387661]
ENSMUSG00000027217	307.834830200786	85.4059907723664	1.8497	0.00015241	0.019427	Tspan18	protein_coding	tetraspanin 18 [Source:MGI Symbol;Acc:MGI:1917186]
ENSMUSG00000027221	1221.96103298917	348.076215472864	1.8117	7.9262e-05	0.012071	Chst1	protein_coding	carbohydrate (keratan sulfate Gal-6) sulfotransferase 1 [Source:MGI Symbol;Acc:MGI:1924219]
ENSMUSG00000027314	4115.14420804309	1047.32064827958	1.9742	1.7244e-05	0.004085	Dll4	protein_coding	delta-like 4 (Drosophila) [Source:MGI Symbol;Acc:MGI:1859388]
ENSMUSG00000027377	376.359208595448	91.2568444285379	2.0441	2.4688e-05	0.0052636	Mall	protein_coding	mal, T cell differentiation protein-like [Source:MGI Symbol;Acc:MGI:2385152]
ENSMUSG00000027412	350.346936060134	105.276087818704	1.7346	0.00015685	0.019778	Lpin3	protein_coding	lipin 3 [Source:MGI Symbol;Acc:MGI:1891342]
ENSMUSG00000027474	363.691108327984	81.3278201661012	2.1609	1.3176e-05	0.0033065	Ccm2l	protein_coding	cerebral cavernous malformation 2-like [Source:MGI Symbol;Acc:MGI:2385159]
ENSMUSG00000027546	854.787290533779	279.718896766671	1.6116	0.00040863	0.037583	Atp9a	protein_coding	ATPase, class II, type 9A [Source:MGI Symbol;Acc:MGI:1330826]
ENSMUSG00000027583	422.023438265264	113.865210041172	1.89	0.00021743	0.025117	Zbtb46	protein_coding	zinc finger and BTB domain containing 46 [Source:MGI Symbol;Acc:MGI:1919397]
ENSMUSG00000027661	143.614403476343	27.5603287845354	2.3815	4.8794e-06	0.0018325	Slc2a10	protein_coding	solute carrier family 2 (facilitated glucose transporter), member 10 [Source:MGI Symbol;Acc:MGI:2156687]
ENSMUSG00000027716	26.0716213956318	1.72209459326315	3.9202	3.1869e-06	0.001497	Trpc3	protein_coding	transient receptor potential cation channel, subfamily C, member 3 [Source:MGI Symbol;Acc:MGI:109526]
ENSMUSG00000027894	50.393760754646	9.17141368924835	2.458	9.0172e-05	0.013301	Slc6a17	protein_coding	solute carrier family 6 (neurotransmitter transporter), member 17 [Source:MGI Symbol;Acc:MGI:2442535]
ENSMUSG00000028024	76.3100465703589	13.3566149566659	2.5143	3.1739e-05	0.0063621	Enpep	protein_coding	glutamyl aminopeptidase [Source:MGI Symbol;Acc:MGI:106645]
ENSMUSG00000028125	98.3239737292528	17.4172450279263	2.497	5.4834e-06	0.0018912	Abca4	protein_coding	ATP-binding cassette, sub-family A (ABC1), member 4 [Source:MGI Symbol;Acc:MGI:109424]
ENSMUSG00000028184	1820.15967145384	360.550316324952	2.3358	0.00013391	0.018366	Lphn2	protein_coding	latrophilin 2 [Source:MGI Symbol;Acc:MGI:2139714]
ENSMUSG00000028259	16.1328575846506	0.248890302473518	6.0183	0.00043069	0.03885	Fhl5	protein_coding	four and a half LIM domains 5 [Source:MGI Symbol;Acc:MGI:1913192]
ENSMUSG00000028339	3014.98043660612	592.681797567073	2.3468	2.7263e-06	0.0014532	Col15a1	protein_coding	collagen, type XV, alpha 1 [Source:MGI Symbol;Acc:MGI:88449]
ENSMUSG00000028469	244.063239153325	71.2072532211534	1.7772	0.00021848	0.025117	Npr2	protein_coding	natriuretic peptide receptor 2 [Source:MGI Symbol;Acc:MGI:97372]
ENSMUSG00000028532	146.254988368421	24.4290374697581	2.5818	0.0001997	0.023418	Cachd1	protein_coding	cache domain containing 1 [Source:MGI Symbol;Acc:MGI:2444177]
ENSMUSG00000028698	559.709511234504	124.042159441946	2.1738	0.0003524	0.034872	Pik3r3	protein_coding	phosphatidylinositol 3 kinase, regulatory subunit, polypeptide 3 (p55) [Source:MGI Symbol;Acc:MGI:109277]
ENSMUSG00000029309	9404.02074565247	2040.698252002	2.2042	2.607e-06	0.0014219	Sparcl1	protein_coding	SPARC-like 1 [Source:MGI Symbol;Acc:MGI:108110]
ENSMUSG00000029648	9653.51978827834	2130.84473351509	2.1796	3.0089e-06	0.001497	Flt1	protein_coding	FMS-like tyrosine kinase 1 [Source:MGI Symbol;Acc:MGI:95558]
ENSMUSG00000029669	301.505994428077	84.7234299265761	1.8314	0.00013851	0.018563	Tspan12	protein_coding	tetraspanin 12 [Source:MGI Symbol;Acc:MGI:1889818]
ENSMUSG00000029710	832.519151392938	261.284675384168	1.6719	0.00026584	0.028074	Ephb4	protein_coding	Eph receptor B4 [Source:MGI Symbol;Acc:MGI:104757]
ENSMUSG00000029851	153.622409419388	44.6865045840273	1.7815	0.00053606	0.045062	Fam115c	protein_coding	family with sequence similarity 115, member C [Source:MGI Symbol;Acc:MGI:2385258]
ENSMUSG00000030022	4269.90194109299	587.993078506643	2.8603	0.00028176	0.029239	Adamts9	protein_coding	a disintegrin-like and metallopeptidase (reprolysin type) with thrombospondin type 1 motif, 9 [Source:MGI Symbol;Acc:MGI:1916320]
ENSMUSG00000030043	223.554489168433	54.293756966488	2.0418	0.00024688	0.026815	Tacr1	protein_coding	tachykinin receptor 1 [Source:MGI Symbol;Acc:MGI:98475]
ENSMUSG00000030249	1124.76967999523	136.430336808652	3.0434	1.8127e-09	2.1322e-05	Abcc9	protein_coding	ATP-binding cassette, sub-family C (CFTR/MRP), member 9 [Source:MGI Symbol;Acc:MGI:1352630]
ENSMUSG00000030411	354.917671284922	58.5217231265496	2.6004	2.2665e-05	0.0050475	Nova2	protein_coding	neuro-oncological ventral antigen 2 [Source:MGI Symbol;Acc:MGI:104296]
ENSMUSG00000030513	287.958529648649	79.7496389436068	1.8523	7.3244e-05	0.011301	Pcsk6	protein_coding	proprotein convertase subtilisin/kexin type 6 [Source:MGI Symbol;Acc:MGI:102897]
ENSMUSG00000030554	224.519005732838	36.690783709258	2.6133	3.6386e-07	0.00038789	Synm	protein_coding	synemin, intermediate filament protein [Source:MGI Symbol;Acc:MGI:2661187]
ENSMUSG00000030562	216.519735373985	53.2940190374619	2.0225	3.437e-05	0.0066618	Nox4	protein_coding	NADPH oxidase 4 [Source:MGI Symbol;Acc:MGI:1354184]
ENSMUSG00000030683	190.213146100255	43.6009879016067	2.1252	8.3294e-05	0.012443	Sez6l2	protein_coding	seizure related 6 homolog like 2 [Source:MGI Symbol;Acc:MGI:2385295]
ENSMUSG00000031119	176.419784300658	25.3244896230838	2.8004	2.3276e-07	0.00030328	Gpc4	protein_coding	glypican 4 [Source:MGI Symbol;Acc:MGI:104902]
ENSMUSG00000031480	370.498255930692	94.8400828035489	1.9659	5.2649e-05	0.0087908	Thsd1	protein_coding	thrombospondin, type I, domain 1 [Source:MGI Symbol;Acc:MGI:1929096]
ENSMUSG00000031502	52371.8651934191	11368.532322733	2.2037	9.2104e-06	0.0025395	Col4a1	protein_coding	collagen, type IV, alpha 1 [Source:MGI Symbol;Acc:MGI:88454]
ENSMUSG00000031503	33847.868351399	6995.97503711845	2.2745	7.8056e-06	0.0023775	Col4a2	protein_coding	collagen, type IV, alpha 2 [Source:MGI Symbol;Acc:MGI:88455]
ENSMUSG00000031785	1707.16186256321	470.527098011997	1.8593	6.4301e-05	0.010211	Gpr56	protein_coding	G protein-coupled receptor 56 [Source:MGI Symbol;Acc:MGI:1340051]
ENSMUSG00000031790	1027.89306283559	176.156760445021	2.5448	0.00022836	0.025873	Mmp15	protein_coding	matrix metallopeptidase 15 [Source:MGI Symbol;Acc:MGI:109320]
ENSMUSG00000031841	3004.08980775669	816.582351540108	1.8793	3.9714e-05	0.0073922	Cdh13	protein_coding	cadherin 13 [Source:MGI Symbol;Acc:MGI:99551]
ENSMUSG00000031871	14222.2843153507	2147.91967691776	2.7271	9.4227e-08	0.00014733	Cdh5	protein_coding	cadherin 5 [Source:MGI Symbol;Acc:MGI:105057]
ENSMUSG00000032006	272.695480749326	62.2508971977912	2.1311	3.0256e-05	0.0062245	Pdgfd	protein_coding	platelet-derived growth factor, D polypeptide [Source:MGI Symbol;Acc:MGI:1919035]
ENSMUSG00000032092	42.4001849094066	9.94551593750676	2.092	0.00037509	0.035562	Mpzl2	protein_coding	myelin protein zero-like 2 [Source:MGI Symbol;Acc:MGI:1289160]
ENSMUSG00000032125	2525.06352014388	576.544969270305	2.1308	4.8388e-05	0.0083444	Robo4	protein_coding	roundabout homolog 4 (Drosophila) [Source:MGI Symbol;Acc:MGI:1921394]
ENSMUSG00000032135	8644.38233750095	1774.11923181904	2.2847	1.0881e-06	0.00082317	Mcam	protein_coding	melanoma cell adhesion molecule [Source:MGI Symbol;Acc:MGI:1933966]
ENSMUSG00000032198	1440.89081055837	279.33069837175	2.3669	8.6876e-06	0.0025395	Dock6	protein_coding	dedicator of cytokinesis 6 [Source:MGI Symbol;Acc:MGI:1914789]
ENSMUSG00000032232	916.207636938188	236.09419797566	1.9563	0.00019026	0.022882	Cgnl1	protein_coding	cingulin-like 1 [Source:MGI Symbol;Acc:MGI:1915428]
ENSMUSG00000032363	2075.89653197245	450.332981077647	2.2047	3.8959e-05	0.0073477	Adamts7	protein_coding	a disintegrin-like and metallopeptidase (reprolysin type) with thrombospondin type 1 motif, 7 [Source:MGI Symbol;Acc:MGI:1347346]
ENSMUSG00000032372	153.597420337618	44.9686412221015	1.7722	0.00052866	0.0446	Plscr2	protein_coding	phospholipid scramblase 2 [Source:MGI Symbol;Acc:MGI:1270860]
ENSMUSG00000032911	107.203969655055	15.3443018329404	2.8046	7.243e-07	0.00065335	Cspg4	protein_coding	chondroitin sulfate proteoglycan 4 [Source:MGI Symbol;Acc:MGI:2153093]
ENSMUSG00000033032	1248.69190499673	328.283006166682	1.9274	2.4493e-05	0.0052636	Afap1l1	protein_coding	actin filament associated protein 1-like 1 [Source:MGI Symbol;Acc:MGI:2147199]
ENSMUSG00000033170	511.235449109435	70.177322224465	2.8649	3.1699e-08	8.3678e-05	Card10	protein_coding	caspase recruitment domain family, member 10 [Source:MGI Symbol;Acc:MGI:2146012]
ENSMUSG00000033174	2008.22271571793	542.203278963767	1.889	4.6939e-05	0.0082154	Mgll	protein_coding	monoglyceride lipase [Source:MGI Symbol;Acc:MGI:1346042]
ENSMUSG00000033191	6415.65480275561	1370.43698518572	2.227	2.0069e-06	0.0012386	Tie1	protein_coding	tyrosine kinase with immunoglobulin-like and EGF-like domains 1 [Source:MGI Symbol;Acc:MGI:99906]
ENSMUSG00000033278	1529.24121591757	349.444555381117	2.1297	1.065e-05	0.002765	Ptprm	protein_coding	protein tyrosine phosphatase, receptor type, M [Source:MGI Symbol;Acc:MGI:102694]
ENSMUSG00000033287	1986.25330875645	591.636281007393	1.7473	0.0002263	0.025764	Kctd17	protein_coding	potassium channel tetramerisation domain containing 17 [Source:MGI Symbol;Acc:MGI:1920094]
ENSMUSG00000033361	248.879115547788	29.3505521621948	3.084	2.7275e-09	2.1322e-05	Prrg3	protein_coding	proline rich Gla (G-carboxyglutamic acid) 3 (transmembrane) [Source:MGI Symbol;Acc:MGI:2685214]
ENSMUSG00000033377	397.500858166449	118.460195822879	1.7466	0.00026714	0.028074	Palmd	protein_coding	palmdelphin [Source:MGI Symbol;Acc:MGI:2148896]
ENSMUSG00000033436	580.525586717851	159.746375817794	1.8616	0.00013284	0.018326	Armcx2	protein_coding	armadillo repeat containing, X-linked 2 [Source:MGI Symbol;Acc:MGI:1914666]
ENSMUSG00000033788	1448.88600681126	241.380852972801	2.5856	2.2054e-07	0.00030328	Dysf	protein_coding	dysferlin [Source:MGI Symbol;Acc:MGI:1349385]
ENSMUSG00000033960	1408.56595131901	467.770595094777	1.5904	0.00050771	0.043142	9430020K01Rik	protein_coding	RIKEN cDNA 9430020K01 gene [Source:MGI Symbol;Acc:MGI:2685174]
ENSMUSG00000034037	1134.23861498285	173.180897772374	2.7114	4.1294e-08	8.9324e-05	Fgd5	protein_coding	FYVE, RhoGEF and PH domain containing 5 [Source:MGI Symbol;Acc:MGI:2443369]
ENSMUSG00000034382	52.8686883806593	10.7622162218078	2.2964	0.00043024	0.03885	AI661453	protein_coding	expressed sequence AI661453 [Source:MGI Symbol;Acc:MGI:2146908]
ENSMUSG00000034471	1077.95078579674	315.793810471928	1.7712	0.00018366	0.022318	Caskin2	protein_coding	CASK-interacting protein 2 [Source:MGI Symbol;Acc:MGI:2157062]
ENSMUSG00000034675	1856.43311255445	629.13636287218	1.5611	0.00044334	0.039535	Dbn1	protein_coding	drebrin 1 [Source:MGI Symbol;Acc:MGI:1931838]
ENSMUSG00000034684	4198.78528458427	1024.34957428206	2.0353	3.0048e-05	0.0062245	Sema3f	protein_coding	sema domain, immunoglobulin domain (Ig), short basic domain, secreted, (semaphorin) 3F [Source:MGI Symbol;Acc:MGI:1096347]
ENSMUSG00000034845	17467.2329464346	4101.0383327643	2.0906	7.0918e-06	0.0021885	Plvap	protein_coding	plasmalemma vesicle associated protein [Source:MGI Symbol;Acc:MGI:1890497]
ENSMUSG00000034898	350.990264071795	72.4498478805943	2.2764	4.6796e-06	0.0018292	Filip1	protein_coding	filamin A interacting protein 1 [Source:MGI Symbol;Acc:MGI:1917848]
ENSMUSG00000034911	974.02409124157	214.153138980155	2.1853	5.2282e-06	0.0018864	Ushbp1	protein_coding	Usher syndrome 1C binding protein 1 [Source:MGI Symbol;Acc:MGI:1922920]
ENSMUSG00000035104	195.090432736297	43.8161069806692	2.1546	1.2202e-05	0.0031106	Eva1a	protein_coding	eva-1 homolog A (C. elegans) [Source:MGI Symbol;Acc:MGI:2385247]
ENSMUSG00000035165	609.822518852675	206.160231182014	1.5646	0.00037196	0.035562	Kcne3	protein_coding	potassium voltage-gated channel, Isk-related subfamily, gene 3 [Source:MGI Symbol;Acc:MGI:1891124]
ENSMUSG00000035441	607.872327996889	133.826046272074	2.1834	8.1e-06	0.0024355	Myo1d	protein_coding	myosin ID [Source:MGI Symbol;Acc:MGI:107728]
ENSMUSG00000035566	386.539508937784	43.5604992626624	3.1495	1.3534e-06	0.00096225	Pcdh17	protein_coding	protocadherin 17 [Source:MGI Symbol;Acc:MGI:2684924]
ENSMUSG00000036144	513.686597595387	126.984884587991	2.0162	0.00050648	0.043142	Meox2	protein_coding	mesenchyme homeobox 2 [Source:MGI Symbol;Acc:MGI:103219]
ENSMUSG00000036256	17455.4870273194	4814.40080932126	1.8583	0.00046999	0.04113	Igfbp7	protein_coding	insulin-like growth factor binding protein 7 [Source:MGI Symbol;Acc:MGI:1352480]
ENSMUSG00000036298	193.214578773347	38.164247158579	2.3399	6.9695e-06	0.0021885	Slc2a13	protein_coding	solute carrier family 2 (facilitated glucose transporter), member 13 [Source:MGI Symbol;Acc:MGI:2146030]
ENSMUSG00000036502	463.74793249678	105.834503520058	2.1315	6.2931e-06	0.0020499	Tmem255a	protein_coding	transmembrane protein 255A [Source:MGI Symbol;Acc:MGI:3045722]
ENSMUSG00000036862	1095.75154432809	153.782571480026	2.833	1.0827e-08	4.4728e-05	Dchs1	protein_coding	dachsous 1 (Drosophila) [Source:MGI Symbol;Acc:MGI:2685011]
ENSMUSG00000036885	166.716194570513	28.6201600076101	2.5423	1.0514e-06	0.00082195	Arhgef26	protein_coding	Rho guanine nucleotide exchange factor (GEF) 26 [Source:MGI Symbol;Acc:MGI:1918053]
ENSMUSG00000036960	448.367135976372	54.2062798178882	3.0481	5.0857e-09	2.9819e-05	Clca5	protein_coding	chloride channel calcium activated 5 [Source:MGI Symbol;Acc:MGI:2139758]
ENSMUSG00000037031	935.972762879791	206.771214514787	2.1784	5.864e-06	0.0019647	Tspan15	protein_coding	tetraspanin 15 [Source:MGI Symbol;Acc:MGI:1917673]
ENSMUSG00000037035	8967.69531106012	1769.52560799835	2.3414	9.2156e-06	0.0025395	Inhbb	protein_coding	inhibin beta-B [Source:MGI Symbol;Acc:MGI:96571]
ENSMUSG00000037169	44.9673479136854	3.15290948898481	3.8341	3.2111e-08	8.3678e-05	Mycn	protein_coding	v-myc myelocytomatosis viral related oncogene, neuroblastoma derived (avian) [Source:MGI Symbol;Acc:MGI:97357]
ENSMUSG00000037347	453.51386214534	127.335680680385	1.8325	8.1916e-05	0.012315	Chst7	protein_coding	carbohydrate (N-acetylglucosamino) sulfotransferase 7 [Source:MGI Symbol;Acc:MGI:1891767]
ENSMUSG00000037358	145.487915931681	22.788444744478	2.6745	6.4278e-06	0.0020651	4930578C19Rik	protein_coding	RIKEN cDNA 4930578C19 gene [Source:MGI Symbol;Acc:MGI:1923155]
ENSMUSG00000037736	73.2265738749917	16.7719441269965	2.1263	0.00016274	0.020302	Limch1	protein_coding	LIM and calponin homology domains 1 [Source:MGI Symbol;Acc:MGI:1924819]
ENSMUSG00000038146	838.565759096886	96.4091635029959	3.1207	2.5819e-09	2.1322e-05	Notch3	protein_coding	notch 3 [Source:MGI Symbol;Acc:MGI:99460]
ENSMUSG00000038168	413.102670732269	119.370416106282	1.7911	0.00026606	0.028074	Leprel1	protein_coding	leprecan-like 1 [Source:MGI Symbol;Acc:MGI:2146663]
ENSMUSG00000038235	3399.95453616099	1097.83836446461	1.6308	0.00054529	0.045674	F11r	protein_coding	F11 receptor [Source:MGI Symbol;Acc:MGI:1321398]
ENSMUSG00000038264	9791.08344836126	2645.05767537769	1.8882	4.7692e-05	0.0082853	Sema7a	protein_coding	sema domain, immunoglobulin domain (Ig), and GPI membrane anchor, (semaphorin) 7A [Source:MGI Symbol;Acc:MGI:1306826]
ENSMUSG00000038296	606.948884239665	132.974372938129	2.1904	4.8792e-06	0.0018325	Galnt18	protein_coding	UDP-N-acetyl-alpha-D-galactosamine:polypeptide N-acetylgalactosaminyltransferase 18 [Source:MGI Symbol;Acc:MGI:2446239]
ENSMUSG00000038530	207.540401003704	36.5250807825814	2.5064	1.4945e-06	0.0010014	Rgs4	protein_coding	regulator of G-protein signaling 4 [Source:MGI Symbol;Acc:MGI:108409]
ENSMUSG00000038781	515.342737198545	166.027250475449	1.6341	0.00056337	0.04702	Stap2	protein_coding	signal transducing adaptor family member 2 [Source:MGI Symbol;Acc:MGI:2147039]
ENSMUSG00000039167	1814.60408513117	489.929130483393	1.889	0.00010909	0.015601	Eltd1	protein_coding	EGF, latrophilin seven transmembrane domain containing 1 [Source:MGI Symbol;Acc:MGI:2655562]
ENSMUSG00000039349	1191.57545777077	290.597765440812	2.0358	0.00019474	0.023162	C130074G19Rik	protein_coding	RIKEN cDNA C130074G19 gene [Source:MGI Symbol;Acc:MGI:2444831]
ENSMUSG00000039578	129.466446006497	26.4552536396954	2.291	1.0108e-05	0.0026636	Ccser1	protein_coding	coiled-coil serine rich 1 [Source:MGI Symbol;Acc:MGI:3045354]
ENSMUSG00000039706	1293.47140334594	264.53737605498	2.2897	2.3708e-06	0.0013562	Ldb2	protein_coding	LIM domain binding 2 [Source:MGI Symbol;Acc:MGI:894670]
ENSMUSG00000039713	982.715636166676	190.575683952803	2.3664	9.5441e-07	0.00079007	Plekhg5	protein_coding	pleckstrin homology domain containing, family G (with RhoGef domain) member 5 [Source:MGI Symbol;Acc:MGI:2652860]
ENSMUSG00000039831	2361.89430370814	508.780218896082	2.2148	3.1967e-06	0.001497	Arhgap29	protein_coding	Rho GTPase activating protein 29 [Source:MGI Symbol;Acc:MGI:2443818]
ENSMUSG00000039943	383.137525221906	84.8087872804011	2.1756	0.00023655	0.026292	Plcb4	protein_coding	phospholipase C, beta 4 [Source:MGI Symbol;Acc:MGI:107464]
ENSMUSG00000040289	414.400159944581	100.103682897277	2.0495	1.7034e-05	0.0040764	Hey1	protein_coding	hairy/enhancer-of-split related with YRPW motif 1 [Source:MGI Symbol;Acc:MGI:1341800]
ENSMUSG00000040447	934.887395910647	258.631607876412	1.8539	6.4434e-05	0.010211	Spns2	protein_coding	spinster homolog 2 [Source:MGI Symbol;Acc:MGI:2384936]
ENSMUSG00000040606	207.41316417262	45.5543654449649	2.1868	3.1441e-05	0.0063567	Kazn	protein_coding	kazrin, periplakin interacting protein [Source:MGI Symbol;Acc:MGI:1918779]
ENSMUSG00000040612	248.79886564169	35.8978633053643	2.793	4.2757e-08	8.9324e-05	Ildr2	protein_coding	immunoglobulin-like domain containing receptor 2 [Source:MGI Symbol;Acc:MGI:1196370]
ENSMUSG00000040624	893.972932078924	204.998437625974	2.1246	8.1584e-05	0.012315	Plekhg1	protein_coding	pleckstrin homology domain containing, family G (with RhoGef domain) member 1 [Source:MGI Symbol;Acc:MGI:2676551]
ENSMUSG00000040732	1044.43638277467	226.028614358551	2.2081	9.2386e-06	0.0025395	Erg	protein_coding	avian erythroblastosis virus E-26 (v-ets) oncogene related [Source:MGI Symbol;Acc:MGI:95415]
ENSMUSG00000040875	207.347509862656	51.2521545261241	2.0164	7.191e-05	0.011169	Osbpl10	protein_coding	oxysterol binding protein-like 10 [Source:MGI Symbol;Acc:MGI:1921736]
ENSMUSG00000041134	1172.14730988246	247.331979627659	2.2446	5.2526e-05	0.0087908	Cyyr1	protein_coding	cysteine and tyrosine-rich protein 1 [Source:MGI Symbol;Acc:MGI:2152187]
ENSMUSG00000041329	66.8797014823095	13.874218794013	2.2692	0.00010983	0.015611	Atp1b2	protein_coding	ATPase, Na+/K+ transporting, beta 2 polypeptide [Source:MGI Symbol;Acc:MGI:88109]
ENSMUSG00000041445	2416.59563258523	367.833969608265	2.7158	4.5704e-08	8.9324e-05	Mmrn2	protein_coding	multimerin 2 [Source:MGI Symbol;Acc:MGI:2385618]
ENSMUSG00000041482	699.412220741354	69.4328259106357	3.3325	4.9225e-06	0.0018325	Piezo2	protein_coding	piezo-type mechanosensitive ion channel component 2 [Source:MGI Symbol;Acc:MGI:1918781]
ENSMUSG00000041633	265.008771942673	67.0811751773936	1.9821	0.00013642	0.018563	Kctd12b	protein_coding	potassium channel tetramerisation domain containing 12b [Source:MGI Symbol;Acc:MGI:2444667]
ENSMUSG00000041729	194.102705172451	46.074351520992	2.0748	2.4127e-05	0.0052393	Coro2b	protein_coding	coronin, actin binding protein, 2B [Source:MGI Symbol;Acc:MGI:2444283]
ENSMUSG00000041741	117.478954453294	20.6899745844552	2.5054	7.0405e-06	0.0021885	Pde3a	protein_coding	phosphodiesterase 3A, cGMP inhibited [Source:MGI Symbol;Acc:MGI:1860764]
ENSMUSG00000041992	865.650458512173	113.651555395888	2.9292	2.494e-07	0.00030785	Rapgef5	protein_coding	Rap guanine nucleotide exchange factor (GEF) 5 [Source:MGI Symbol;Acc:MGI:2444365]
ENSMUSG00000042116	1653.64718431791	451.692677188666	1.8722	4.6373e-05	0.0081774	Vwa1	protein_coding	von Willebrand factor A domain containing 1 [Source:MGI Symbol;Acc:MGI:2179729]
ENSMUSG00000042216	47.0954246091755	10.6558748885273	2.1439	0.00034943	0.034725	Sgsm1	protein_coding	small G protein signaling modulator 1 [Source:MGI Symbol;Acc:MGI:107320]
ENSMUSG00000042284	1047.91592128235	226.223291144193	2.2117	4.3795e-05	0.0078407	Itga1	protein_coding	integrin alpha 1 [Source:MGI Symbol;Acc:MGI:96599]
ENSMUSG00000042607	117.669845990263	33.0978578486305	1.8299	0.00048913	0.042331	Asb4	protein_coding	ankyrin repeat and SOCS box-containing 4 [Source:MGI Symbol;Acc:MGI:1929751]
ENSMUSG00000042734	646.788116834655	172.139796022682	1.9097	0.00019653	0.023162	Ttc9	protein_coding	tetratricopeptide repeat domain 9 [Source:MGI Symbol;Acc:MGI:1916730]
ENSMUSG00000042807	205.239469564938	48.9426378127353	2.0681	0.00038296	0.035783	Hecw2	protein_coding	HECT, C2 and WW domain containing E3 ubiquitin protein ligase 2 [Source:MGI Symbol;Acc:MGI:2685817]
ENSMUSG00000042961	72.6429339332294	12.9182451324823	2.4914	5.8016e-05	0.0094489	Egflam	protein_coding	EGF-like, fibronectin type III and laminin G domains [Source:MGI Symbol;Acc:MGI:2146149]
ENSMUSG00000043079	3349.39352526636	969.82360218399	1.7881	0.00010678	0.015458	Synpo	protein_coding	synaptopodin [Source:MGI Symbol;Acc:MGI:1099446]
ENSMUSG00000043230	24.8192000716825	2.37431477270169	3.3859	2.2813e-05	0.0050475	Fam124b	protein_coding	family with sequence similarity 124, member B [Source:MGI Symbol;Acc:MGI:3026880]
ENSMUSG00000043251	705.656561466366	191.487953302773	1.8817	4.0737e-05	0.0075229	Exoc3l	protein_coding	exocyst complex component 3-like [Source:MGI Symbol;Acc:MGI:3041195]
ENSMUSG00000043556	69.4881165651824	8.21543869752815	3.0804	0.00047875	0.04174	Fbxl7	protein_coding	F-box and leucine-rich repeat protein 7 [Source:MGI Symbol;Acc:MGI:3052506]
ENSMUSG00000043943	75.8614859855064	16.8100023357796	2.174	0.00014345	0.018901	Naalad2	protein_coding	N-acetylated alpha-linked acidic dipeptidase 2 [Source:MGI Symbol;Acc:MGI:1919810]
ENSMUSG00000044043	89.2575351047405	16.8925068274002	2.4016	2.1022e-05	0.0049303	Pcdhb14	protein_coding	protocadherin beta 14 [Source:MGI Symbol;Acc:MGI:2136749]
ENSMUSG00000044317	879.658905315122	206.0185309943	2.0942	5.479e-06	0.0018912	Gpr4	protein_coding	G protein-coupled receptor 4 [Source:MGI Symbol;Acc:MGI:2441992]
ENSMUSG00000044562	2238.46019099235	557.92819163517	2.0044	0.00033865	0.033942	Rasip1	protein_coding	Ras interacting protein 1 [Source:MGI Symbol;Acc:MGI:1917153]
ENSMUSG00000045103	96.774508720827	23.9136022802495	2.0168	0.0002251	0.025753	Dmd	protein_coding	dystrophin, muscular dystrophy [Source:MGI Symbol;Acc:MGI:94909]
ENSMUSG00000045180	524.577395702338	124.623422382789	2.0736	9.312e-06	0.0025395	Shroom2	protein_coding	shroom family member 2 [Source:MGI Symbol;Acc:MGI:107194]
ENSMUSG00000045333	255.105224899199	38.4520913126068	2.73	9.5817e-05	0.014045	Zfp423	protein_coding	zinc finger protein 423 [Source:MGI Symbol;Acc:MGI:1891217]
ENSMUSG00000045534	50.0307033956034	12.1880662344354	2.0373	0.00030224	0.030954	Kcna5	protein_coding	potassium voltage-gated channel, shaker-related subfamily, member 5 [Source:MGI Symbol;Acc:MGI:96662]
ENSMUSG00000045636	578.288060850905	180.891774880834	1.6767	0.0004534	0.040279	Mtus1	protein_coding	mitochondrial tumor suppressor 1 [Source:MGI Symbol;Acc:MGI:2142572]
ENSMUSG00000045689	41.4765896030499	7.73637009959663	2.4226	0.00010842	0.0156	Pcdhb4	protein_coding	protocadherin beta 4 [Source:MGI Symbol;Acc:MGI:2136738]
ENSMUSG00000046275	39.8261589812719	7.99065034099856	2.3173	0.00037277	0.035562	Tusc5	protein_coding	tumor suppressor candidate 5 [Source:MGI Symbol;Acc:MGI:3029307]
ENSMUSG00000046280	648.945419008118	123.228063258994	2.3968	4.3442e-06	0.0017489	She	protein_coding	src homology 2 domain-containing transforming protein E [Source:MGI Symbol;Acc:MGI:1099462]
ENSMUSG00000046470	1419.65315408791	305.292037660443	2.2173	3.2867e-06	0.001497	Sox18	protein_coding	SRY (sex determining region Y)-box 18 [Source:MGI Symbol;Acc:MGI:103559]
ENSMUSG00000046714	91.7066352450895	17.7117460165577	2.3723	1.5366e-05	0.003754	Foxc2	protein_coding	forkhead box C2 [Source:MGI Symbol;Acc:MGI:1347481]
ENSMUSG00000046856	87.9708166726043	16.5031327153313	2.4143	0.00024077	0.02651	Gpr1	protein_coding	G protein-coupled receptor 1 [Source:MGI Symbol;Acc:MGI:2385324]
ENSMUSG00000046916	755.812773212753	238.544240108185	1.6638	0.00024911	0.026923	Myct1	protein_coding	myc target 1 [Source:MGI Symbol;Acc:MGI:1915882]
ENSMUSG00000047330	335.351157136918	68.3134842018736	2.2954	3.4632e-06	0.0015325	Kcne4	protein_coding	potassium voltage-gated channel, Isk-related subfamily, gene 4 [Source:MGI Symbol;Acc:MGI:1891125]
ENSMUSG00000047497	279.865915720722	31.4886613840237	3.1518	1.1443e-08	4.4728e-05	Adamts12	protein_coding	a disintegrin-like and metallopeptidase (reprolysin type) with thrombospondin type 1 motif, 12 [Source:MGI Symbol;Acc:MGI:2146046]
ENSMUSG00000047910	90.1522421187881	18.8792962327709	2.2556	2.7304e-05	0.005769	Pcdhb16	protein_coding	protocadherin beta 16 [Source:MGI Symbol;Acc:MGI:2136752]
ENSMUSG00000048450	73.0629234931234	14.9074126589128	2.2931	4.3042e-05	0.007765	Msx1	protein_coding	msh homeobox 1 [Source:MGI Symbol;Acc:MGI:97168]
ENSMUSG00000048960	1557.32390023052	250.049618672884	2.6388	0.000233	0.026022	Prex2	protein_coding	phosphatidylinositol-3,4,5-trisphosphate-dependent Rac exchange factor 2 [Source:MGI Symbol;Acc:MGI:1923385]
ENSMUSG00000049791	511.758400531537	77.1848902536264	2.7291	9.2433e-08	0.00014733	Fzd4	protein_coding	frizzled homolog 4 (Drosophila) [Source:MGI Symbol;Acc:MGI:108520]
ENSMUSG00000049804	387.723733772301	93.0230606153106	2.0594	0.00011916	0.016835	Armcx4	protein_coding	armadillo repeat containing, X-linked 4 [Source:MGI Symbol;Acc:MGI:2147887]
ENSMUSG00000050147	151.641959784373	48.6164279362722	1.6412	0.00046914	0.04113	F2rl3	protein_coding	coagulation factor II (thrombin) receptor-like 3 [Source:MGI Symbol;Acc:MGI:1298207]
ENSMUSG00000050234	297.132024177256	83.89372356692	1.8245	0.0003573	0.035209	Gja4	protein_coding	gap junction protein, alpha 4 [Source:MGI Symbol;Acc:MGI:95715]
ENSMUSG00000050493	594.852992998151	188.323629152772	1.6593	0.00037376	0.035562	Fam167b	protein_coding	family with sequence similarity 167, member B [Source:MGI Symbol;Acc:MGI:2668032]
ENSMUSG00000050666	86.4689854667543	20.222741458702	2.0962	0.0001958	0.023162	Vstm4	protein_coding	V-set and transmembrane domain containing 4 [Source:MGI Symbol;Acc:MGI:2444633]
ENSMUSG00000050896	108.696225962568	26.6993857448653	2.0254	0.00018008	0.02204	Rtn4rl2	protein_coding	reticulon 4 receptor-like 2 [Source:MGI Symbol;Acc:MGI:2669796]
ENSMUSG00000050919	144.998586126818	27.381306242899	2.4048	3.8303e-05	0.0073034	Zfp366	protein_coding	zinc finger protein 366 [Source:MGI Symbol;Acc:MGI:2178429]
ENSMUSG00000051236	560.882694768657	155.164505127693	1.8539	8.9816e-05	0.013301	Msrb3	protein_coding	methionine sulfoxide reductase B3 [Source:MGI Symbol;Acc:MGI:2443538]
ENSMUSG00000051323	165.239554538776	41.0338049615607	2.0097	0.00015176	0.019427	Pcdh19	protein_coding	protocadherin 19 [Source:MGI Symbol;Acc:MGI:2685563]
ENSMUSG00000051339	816.642884225379	242.378737224976	1.7524	0.00025759	0.027712	2900026A02Rik	protein_coding	RIKEN cDNA 2900026A02 gene [Source:MGI Symbol;Acc:MGI:1920194]
ENSMUSG00000051375	4340.22551182276	654.212147123465	2.7299	5.6941e-05	0.0094046	Pcdh1	protein_coding	protocadherin 1 [Source:MGI Symbol;Acc:MGI:104692]
ENSMUSG00000051851	130.750589203804	32.6182074016362	2.0031	0.00012218	0.017078	Cxx1c	protein_coding	CAAX box 1C [Source:MGI Symbol;Acc:MGI:1920115]
ENSMUSG00000051855	1379.86774838249	220.79625277297	2.6437	0.0001424	0.018901	Mest	protein_coding	mesoderm specific transcript [Source:MGI Symbol;Acc:MGI:96968]
ENSMUSG00000052133	35.8382313490848	5.96829161208744	2.5861	0.00014598	0.01902	Sema5b	protein_coding	sema domain, seven thrombospondin repeats (type 1 and type 1-like), transmembrane domain (TM) and short cytoplasmic domain, (semaphorin) 5B [Source:MGI Symbol;Acc:MGI:107555]
ENSMUSG00000052373	87.9961023084946	18.4581577654468	2.2532	1.3253e-05	0.0033065	Mpp3	protein_coding	membrane protein, palmitoylated 3 (MAGUK p55 subfamily member 3) [Source:MGI Symbol;Acc:MGI:1328354]
ENSMUSG00000052544	48.4195810045489	8.80185636588384	2.4597	5.2851e-05	0.0087908	St6galnac3	protein_coding	ST6 (alpha-N-acetyl-neuraminyl-2,3-beta-galactosyl-1,3)-N-acetylgalactosaminide alpha-2,6-sialyltransferase 3 [Source:MGI Symbol;Acc:MGI:1341828]
ENSMUSG00000052921	894.576274567982	188.537052914751	2.2464	2.508e-06	0.0014005	Arhgef15	protein_coding	Rho guanine nucleotide exchange factor (GEF) 15 [Source:MGI Symbol;Acc:MGI:3045246]
ENSMUSG00000053062	1949.55743514032	378.284680795061	2.3656	0.00020141	0.023501	Jam2	protein_coding	junction adhesion molecule 2 [Source:MGI Symbol;Acc:MGI:1933820]
ENSMUSG00000053626	426.541518916003	81.3366365444687	2.3907	2.1968e-06	0.001288	Tll1	protein_coding	tolloid-like [Source:MGI Symbol;Acc:MGI:106923]
ENSMUSG00000054555	404.736096886368	66.1723049073216	2.6127	4.4014e-07	0.00044881	Adam12	protein_coding	a disintegrin and metallopeptidase domain 12 (meltrin alpha) [Source:MGI Symbol;Acc:MGI:105378]
ENSMUSG00000054580	74.278207902839	18.2879628686885	2.022	0.00039922	0.036862	Pla2r1	protein_coding	phospholipase A2 receptor 1 [Source:MGI Symbol;Acc:MGI:102468]
ENSMUSG00000054690	2620.50962371155	888.724491576386	1.56	0.00037604	0.035562	Emcn	protein_coding	endomucin [Source:MGI Symbol;Acc:MGI:1891716]
ENSMUSG00000055322	2473.27620086924	745.243589049126	1.7306	0.00039232	0.036368	Tns1	protein_coding	tensin 1 [Source:MGI Symbol;Acc:MGI:104552]
ENSMUSG00000055555	266.519932885768	90.9835406758998	1.5506	0.00057756	0.047864	4930502E18Rik	protein_coding	RIKEN cDNA 4930502E18 gene [Source:MGI Symbol;Acc:MGI:1922263]
ENSMUSG00000056492	8692.61926517214	1590.48717113556	2.4503	3.406e-07	0.00038789	Gpr116	protein_coding	G protein-coupled receptor 116 [Source:MGI Symbol;Acc:MGI:2182928]
ENSMUSG00000057530	6340.01772554542	1599.46397174747	1.9869	3.4269e-05	0.0066618	Ece1	protein_coding	endothelin converting enzyme 1 [Source:MGI Symbol;Acc:MGI:1101357]
ENSMUSG00000058254	1307.5995289916	273.535053362589	2.2571	3.2216e-06	0.001497	Tspan7	protein_coding	tetraspanin 7 [Source:MGI Symbol;Acc:MGI:1298407]
ENSMUSG00000059430	44.0952935041513	8.12246994989159	2.4406	0.00018043	0.02204	Actg2	protein_coding	actin, gamma 2, smooth muscle, enteric [Source:MGI Symbol;Acc:MGI:104589]
ENSMUSG00000061751	119.835411408444	29.5993394743705	2.0174	0.00025897	0.027731	Kalrn	protein_coding	kalirin, RhoGEF kinase [Source:MGI Symbol;Acc:MGI:2685385]
ENSMUSG00000062609	152.965326705575	31.8558906059424	2.2636	0.00014797	0.019068	Kcnj15	protein_coding	potassium inwardly-rectifying channel, subfamily J, member 15 [Source:MGI Symbol;Acc:MGI:1310000]
ENSMUSG00000062960	2896.15226105456	598.877374466675	2.2738	3.9016e-06	0.0016637	Kdr	protein_coding	kinase insert domain protein receptor [Source:MGI Symbol;Acc:MGI:96683]
ENSMUSG00000063687	36.5073751221891	6.98266914948434	2.3863	0.00026013	0.027731	Pcdhb5	protein_coding	protocadherin beta 5 [Source:MGI Symbol;Acc:MGI:2136739]
ENSMUSG00000066571	1048.20368540766	300.791668264815	1.8011	0.00030547	0.031058	4931406P16Rik	protein_coding	RIKEN cDNA 4931406P16 gene [Source:MGI Symbol;Acc:MGI:1924311]
ENSMUSG00000068735	7284.14205951015	2292.87424201743	1.6676	0.00014323	0.018901	Trp53i11	protein_coding	transformation related protein 53 inducible protein 11 [Source:MGI Symbol;Acc:MGI:2670995]
ENSMUSG00000070643	262.541725877719	52.3016244834807	2.3276	4.2963e-06	0.0017489	Sox13	protein_coding	SRY (sex determining region Y)-box 13 [Source:MGI Symbol;Acc:MGI:98361]
ENSMUSG00000070867	79.1174456067675	18.11127275337	2.1271	0.0001744	0.021528	Trabd2b	protein_coding	TraB domain containing 2B [Source:MGI Symbol;Acc:MGI:3650152]
ENSMUSG00000071042	1022.12500220125	256.530902451404	1.9944	5.2665e-05	0.0087908	Rasgrp3	protein_coding	RAS, guanyl releasing protein 3 [Source:MGI Symbol;Acc:MGI:3028579]
ENSMUSG00000071347	593.54753436483	184.446778573702	1.6862	0.00024696	0.026815	C1qtnf9	protein_coding	C1q and tumor necrosis factor related protein 9 [Source:MGI Symbol;Acc:MGI:3045252]
ENSMUSG00000075592	38.0298716198246	6.34593457246523	2.5832	0.00012233	0.017078	Nynrin	protein_coding	NYN domain and retroviral integrase containing [Source:MGI Symbol;Acc:MGI:2652872]
ENSMUSG00000079481	383.847379137348	107.89007652973	1.831	0.00033148	0.03351	Nhsl2	protein_coding	NHS-like 2 [Source:MGI Symbol;Acc:MGI:3645090]
ENSMUSG00000084882	23.6307937341363	3.22257077128331	2.8744	0.00041165	0.037713	Gm16047	antisense	predicted gene 16047 [Source:MGI Symbol;Acc:MGI:3802092]
ENSMUSG00000084883	262.512119112952	63.5004073158365	2.0475	3.383e-05	0.0066618	Ccdc85c	protein_coding	coiled-coil domain containing 85C [Source:MGI Symbol;Acc:MGI:3644008]
ENSMUSG00000085399	120.526710698691	32.8803081757673	1.8741	0.00037519	0.035562	Foxd2os	processed_transcript	forkhead box D2, opposite strand [Source:MGI Symbol;Acc:MGI:2444065]
ENSMUSG00000085573	23.3242924924696	1.50523242013952	3.9538	1.4342e-05	0.0035407	Gm15418	antisense	predicted gene 15418 [Source:MGI Symbol;Acc:MGI:3705275]
ENSMUSG00000086043	144.883255222125	10.7689824904049	3.7499	4.1155e-06	0.0017236	Gm12473	antisense	predicted gene 12473 [Source:MGI Symbol;Acc:MGI:3652337]
ENSMUSG00000086181	12.0504432793626	0	Inf	0.00018843	0.02278	C230034O21Rik	processed_transcript	RIKEN cDNA C230034O21 gene [Source:MGI Symbol;Acc:MGI:2441892]
ENSMUSG00000086298	34.8481354115616	4.2438188977646	3.0376	2.3253e-05	0.0050967	Gm11716	antisense	predicted gene 11716 [Source:MGI Symbol;Acc:MGI:3649215]
ENSMUSG00000086602	35.3478770452869	6.24921004391084	2.4999	0.00027175	0.028326	Gm15609	processed_transcript	predicted gene 15609 [Source:MGI Symbol;Acc:MGI:3783055]
ENSMUSG00000087028	29.0289609922999	5.31247643552789	2.45	0.00046101	0.040647	Gm13387	lincRNA	predicted gene 13387 [Source:MGI Symbol;Acc:MGI:3651242]
ENSMUSG00000090698	6111.76224019599	1420.4488548885	2.1052	8.8229e-06	0.0025395	Apold1	protein_coding	apolipoprotein L domain containing 1 [Source:MGI Symbol;Acc:MGI:2685921]
ENSMUSG00000090958	3045.02253119728	503.678763184796	2.5959	1.6076e-06	0.0010473	Lrrc32	protein_coding	leucine rich repeat containing 32 [Source:MGI Symbol;Acc:MGI:93882]
ENSMUSG00000095440	269.510079004859	71.3771022693641	1.9168	0.00015649	0.019778	Fignl2	protein_coding	fidgetin-like 2 [Source:MGI Symbol;Acc:MGI:3646919]
ENSMUSG00000095649	12.8423151574667	1.16776018737736	3.4591	0.00050575	0.043142	Gm8979	pseudogene	predicted gene 8979 [Source:MGI Symbol;Acc:MGI:3703149]
ENSMUSG00000097325	33.6090246079493	3.82421026796378	3.1356	0.00019265	0.023052	Gm16897	lincRNA	predicted gene, 16897 [Source:MGI Symbol;Acc:MGI:4439821]
ENSMUSG00000097391	28.0965788124918	3.3473603374846	3.0693	0.00029166	0.030133	Mirg	lincRNA	miRNA containing gene [Source:MGI Symbol;Acc:MGI:3781106]
ENSMUSG00000097451	258.687932716644	50.9924264252429	2.3429	8.9884e-06	0.0025395	Rian	processed_transcript	RNA imprinted and accumulated in nucleus [Source:MGI Symbol;Acc:MGI:1922995]
ENSMUSG00000097828	134.320763376206	29.7850637131058	2.173	5.8898e-05	0.0095265	6430562O15Rik	lincRNA	RIKEN cDNA 6430562O15 gene [Source:MGI Symbol;Acc:MGI:2444982]
ENSMUSG00000097877	14.6548774445812	0.58388009368868	4.6496	2.237e-05	0.0050447	Gm26703	lincRNA	predicted gene, 26703 [Source:MGI Symbol;Acc:MGI:5477197]
Novel00202	173.93806925143	55.8267424221108	1.6395	0.00041933	0.038267	--	Fas antigen - mouse (fragment)>gi|299329|gb|AAB25916.1| Fas antigen, partial [Mus sp.]
Novel00458	18.6802373869394	2.25031835691678	3.0533	0.00043629	0.039204	--	A disintegrin and metalloproteinase with thrombospondin motifs 7 [Rattus norvegicus]>gi|32330236|gb|AAP79641.1| ADAMTS7B preproprotein [Rattus norvegicus]
